# Supplementary material
Source: PubMed Central journal article supplement (PMC8634774)
Supplement: NIHMS1754224-supplement-Supplemental_Data_File___doc___tif__pdf__etc__.pdf [file NIHMS1754224-supplement-Supplemental_Data_File___doc___tif__pdf__etc__.pdf]

## **Motoric Subtypes of Delirium and Long-Term Functional and Mental Health Outcomes in Adults after Critical Illness**

### **SUPPLEMENTAL APPENDIX**

|                                                                                                                     |          |
|---------------------------------------------------------------------------------------------------------------------|----------|
| <b>Supplemental Table 1: Interaction Between Hypoactive and Hyperactive Delirium</b>                                | <b>2</b> |
| <b>Supplemental Table 2: Missingness of Outcomes</b>                                                                | <b>2</b> |
| <b>Supplemental Table 3: Baseline and Enrollment Characteristics of Patients with Complete vs. Partial Outcomes</b> | <b>3</b> |
| <b>Supplemental Table 4: ICU vs Non-ICU Delirium</b>                                                                | <b>4</b> |
| <b>Supplemental Table 5: Length of Stay in ICU and Hospital by Delirium Subtype</b>                                 | <b>4</b> |
| <b>Supplemental Table 6: Employment Status</b>                                                                      | <b>4</b> |

**ST 1: Interaction Between Hypoactive and Hyperactive Delirium**

|        | P-value for Interaction |                    |
|--------|-------------------------|--------------------|
|        | 3-Month Follow Up       | 12-Month Follow Up |
| ADL    | 0.26                    | 0.99               |
| FAQ    | 0.43                    | 0.40               |
| BDI-II | 0.42                    | 0.91               |
| PCL    | 0.51                    | 0.93               |

**ST 2: Missingness of Primary Outcomes**

|        | 3-month follow-up                 |                  | 12-month follow-up                |                  |
|--------|-----------------------------------|------------------|-----------------------------------|------------------|
|        | Patients with Missing Assessments | % of Main Cohort | Patients with Missing Assessments | % of Main Cohort |
| ADL    | 24                                | 4%               | 11                                | 2%               |
| FAQ    | 33                                | 6%               | 14                                | 3%               |
| BDI-II | 55                                | 10%              | 45                                | 9%               |
| PCL    | 41                                | 7%               | 25                                | 5%               |

**ST 3: Baseline and Enrollment Characteristics of Patients with Complete vs. Partial Outcomes**

| Characteristic                                            | N   | Complete 3-Month Evaluation (n=494) | Incomplete 3-Month Evaluation (n= 62) | p-value |
|-----------------------------------------------------------|-----|-------------------------------------|---------------------------------------|---------|
| Age (years)                                               | 556 | 61 (52-70)                          | 67 (59-74)                            | 0.002   |
| Sex (%)                                                   |     |                                     |                                       |         |
| Male                                                      | 556 | 61                                  | 53                                    | 0.24    |
| Female                                                    |     | 39                                  | 47                                    |         |
| Race (%)                                                  |     |                                     |                                       |         |
| Caucasian                                                 | 556 | 90                                  | 87                                    | 0.43    |
| African American                                          |     | 10                                  | 11                                    |         |
| Education (years)                                         | 552 | 12 (12-14)                          | 12 (12-14)                            | 0.25    |
| Charlson score                                            | 556 | 2 (1-4)                             | 3 (2-4)                               | 0.001   |
| Katz ADL at enrollment                                    |     |                                     |                                       |         |
| Score = 0                                                 | 551 | 0 (0-1)                             | 0 (0-1)                               | 0.029   |
| Score > 0                                                 |     | 74%                                 | 61%                                   |         |
| Score > 0                                                 |     | 26%                                 | 39%                                   |         |
| FAQ Score (IADL) at enrollment                            |     |                                     |                                       |         |
| FAQ 0-1                                                   | 551 | 0 (0-2)                             | 0 (0-3)                               | 0.37    |
| FAQ > 1                                                   |     | 62%                                 | 56%                                   |         |
| FAQ > 1                                                   |     | 38%                                 | 44%                                   |         |
| History of depression (%)                                 | 540 | 37%                                 | 35%                                   | 0.73    |
| History of PTSD (%)                                       | 543 | 6%                                  | 7%                                    | 0.89    |
| IQCODE-SF at enrollment                                   | 553 | 3 (3.0-3.12)                        | 3 (3-3.19)                            | 0.2     |
| Mean Modified SOFA in the ICU                             | 552 | 4.7 (3.5-6.5)                       | 4.8 (3.3-6.2)                         | 0.58    |
| Length of mechanical ventilation (days)                   | 488 | 2.2 (0.9-5.8)                       | 2 (1-9.4)                             | 0.59    |
| Days severely septic in the ICU                           | 552 | 2 (0-5)                             | 3 (1-7.8)                             | 0.013   |
| Mean 24hr dose of benzodiazepines in the ICU <sup>b</sup> | 552 | 0.6 (0-6.6)                         | 0.5 (0-5.8)                           | 0.68    |
| Mean 24hr dose of opiates in the ICU <sup>c</sup>         | 552 | 268.3 (1.5-985.3)                   | 261.5 (1.1-861.4)                     | 0.73    |
| Mean 24hr dose of propofol in the ICU                     | 552 | 0 (0-579)                           | 38 (0-560)                            | 0.32    |
| Mean 24hr dose of haloperidol in the ICU                  | 552 | 0 (0-0)                             | 0 (0-0.24)                            | 0.34    |
| Mean 24hr dose of dexmedetomidine in the ICU              | 552 | 0 (0-0)                             | 0 (0-0)                               | 0.79    |

Abbreviations: ADL, Activities of Daily Living; IADL, Instrumental Activities of Daily Living; ICU, intensive care unit; IQCODE-SF, Informant Questionnaire on Cognitive Decline in the Elderly Short Form; PTSD, post-traumatic stress disorder; SOFA, Sequential Organ Failure Assessment.

<sup>a</sup> Median (25<sup>th</sup> -75<sup>th</sup> percentile) unless otherwise noted

<sup>b</sup> Measured in midazolam equivalents

<sup>c</sup> Measured in fentanyl equivalents

**ST4: ICU vs Non-ICU Delirium**

|                         | Hypoactive | Hyperactive | Both     | Neither    |
|-------------------------|------------|-------------|----------|------------|
| Prevalence in ICU       | 364 (65%)  | 84 (15%)    | 49 (9%)  | 498 (90%)  |
| Duration in ICU         | 3 (1-6)    | 1 (1-2)     | 1 (1-2)  | 3 (2-6)    |
| Prevalence on the Floor | 122 (22%)  | 16 (3%)     | 2 (0.4%) | 534 (96%)  |
| Duration on the Floor   | 2 (1-3)    | 1 (1-2)     | 1, 2     | 25 (20-27) |

The prevalence of delirium includes all participants with at least one day of each delirium state (hypoactive, hyperactive, or both) or at least one day without delirium (neither). Duration of delirium state is presented in days as median (interquartile range) within the 28-day study period.

**ST 5: Length of Stay in ICU and Hospital by Delirium Subtype**

|                             | ICU Length of Stay <sup>a</sup> | Hospital Length of Stay <sup>a</sup> |
|-----------------------------|---------------------------------|--------------------------------------|
| Total Cohort (n=556)        | 5 (3-10)                        | 10 (6-17)                            |
| Hypoactive Delirium (n=390) | 6 (3-12)                        | 12 (7-21)                            |
| Hyperactive Delirium (n=95) | 8 (4-16)                        | 17 (10-24)                           |

<sup>a</sup>Length of stay is reported in days as median (interquartile range).

**ST 6: Employment Status**

| Employment Status                                                                                                                                                                                                                                                                                   | N = 554                                                                                                                                                                                         |
|-----------------------------------------------------------------------------------------------------------------------------------------------------------------------------------------------------------------------------------------------------------------------------------------------------|-------------------------------------------------------------------------------------------------------------------------------------------------------------------------------------------------|
| Employed at Enrollment                                                                                                                                                                                                                                                                              | 137 (24%)                                                                                                                                                                                       |
| <ul style="list-style-type: none"> <li>• Full Time</li> <li>• Part Time</li> </ul>                                                                                                                                                                                                                  | <ul style="list-style-type: none"> <li>• 120 (87%)</li> <li>• 18 (13%)</li> </ul>                                                                                                               |
| Employed at 12 Months                                                                                                                                                                                                                                                                               | 69 (12%)                                                                                                                                                                                        |
| <ul style="list-style-type: none"> <li>• Full Time</li> <li>• Part Time</li> </ul>                                                                                                                                                                                                                  | <ul style="list-style-type: none"> <li>• 51 (76%)</li> <li>• 16 (24%)</li> </ul>                                                                                                                |
| Reasons for Not Being Employed at 12 Months                                                                                                                                                                                                                                                         |                                                                                                                                                                                                 |
| <ul style="list-style-type: none"> <li>• Retired</li> <li>• Not physically able to work</li> <li>• Not emotionally able to work</li> <li>• Unable to find work</li> <li>• Elected not to work</li> <li>• Not cognitively able to work</li> <li>• Attending school</li> <li>• Do not know</li> </ul> | <ul style="list-style-type: none"> <li>• 186 (41%)</li> <li>• 245 (53%)</li> <li>• 7 (2%)</li> <li>• 0 (0%)</li> <li>• 15 (3%)</li> <li>• 0 (0%)</li> <li>• 1 (0%)</li> <li>• 3 (1%)</li> </ul> |
